# Supplementary material for: Comparison of pre-processing methods for multiplex bead-based immunoassays
Source: PubMed Central journal article supplement (PMC4982217; doi:10.1186/s12864-016-2888-7), 2016-08-11
Supplement: 12864_2016_2888_MOESM2_ESM.pdf [file 12864_2016_2888_MOESM2_ESM.pdf]

# Supplement for: *Comparison of Pre-processing Methods for Multiplex Bead-Based Immunoassays*

Tanja K. Rausch, Arne Schillert, Andreas Ziegler, Angelika Lueking,  
Hans-Dieter Zucht, Peter Schulz-Knappe

## Part 4: Skewness, tail length and coefficient of variation for all 37 different pre-processing methods

| Pre-processing method  | Skewness | Tail length | Coefficient of variation |
|------------------------|----------|-------------|--------------------------|
| no_loess               | 3.3564   | 5.0443      | 79.9289                  |
| no_quantile            | 3.32     | 5.0093      | 80.0213                  |
| no_quanimpr            | 3.3521   | 5.2749      | 82.4751                  |
| no_rsn                 | 2.054    | 3.2887      | 88.4993                  |
| no_global              | 1.4429   | 6.0856      | 55.1209                  |
| no_zscore              | 1.6482   | 3.3004      | 41.9559                  |
| log2_loess             | 0.4291   | 1.7434      | 54.8009                  |
| log2_quantile          | 0.4454   | 1.7552      | 55.9673                  |
| log2_quanimpr          | 0.3948   | 1.7798      | 67.596                   |
| log2_rsn               | -0.1697  | 1.8272      | 71.2873                  |
| log2_global            | 0.1649   | 2.0798      | 48.7411                  |
| log2_zscore            | 0.3437   | 1.9315      | 46.6501                  |
| asinh_loess            | 0.429    | 1.7427      | 49.0967                  |
| asinh_quantile         | 0.4455   | 1.7552      | 50.3272                  |
| asinh_quanimpr         | 0.3942   | 1.7822      | 65.3201                  |
| asinh_rsn              | -0.0781  | 1.7853      | 66.394                   |
| asinh_global           | 0.1649   | 2.0799      | 49.8506                  |
| asinh_zscore           | 0.3437   | 1.9315      | 49.3457                  |
| boxcox_loess           | -0.0057  | 1.6672      | 34.0007                  |
| boxcox_quantile        | 0.0272   | 1.6856      | 37.2333                  |
| boxcox_quanimpr        | 0.3261   | 2.1103      | 56.6501                  |
| boxcox_rsn             | -0.0144  | 1.6417      | 45.3983                  |
| boxcox_global          | -0.0374  | 1.9627      | 78.5349                  |
| boxcox_zscore          | 0.0922   | 1.9263      | 74.9218                  |
| boxcoxweights_loess    | -0.0057  | 1.6672      | 34.0789                  |
| boxcoxweights_quantile | 0.0236   | 1.6852      | 33.0725                  |
| boxcoxweights_quanimpr | 0.3303   | 2.4182      | 54.0541                  |
| boxcoxweights_rsn      | 0.0467   | 1.6436      | 40.4125                  |
| boxcoxweights_global   | 0.8775   | 2.8134      | 11.7994                  |
| boxcoxweights_zscore   | 0.9512   | 2.8565      | 11.6287                  |
| vst_loess              | 1.71     | 2.1547      | 26.2518                  |
| vst_quantile           | 1.7388   | 2.1068      | 26.394                   |
| vst_quanimpr           | 1.8008   | 2.0988      | 35.2347                  |
| vst_rsn                | 1.96     | 2.8408      | 35.6117                  |
| vst_global             | 0.5529   | 2.6842      | 52.6671                  |
| vst_zscore             | 1.0909   | 2.1658      | 45.6259                  |
| no_vsn                 | 0.1951   | 1.851       | 63.0512                  |

Table S1: Detailed results for evaluation criterias skewness, tail length and coefficient of variation for all 37 different pre-processing methods. Pre-processing methods are displayed as *transformation\_normalization*.
